# Supplementary figures and images for: High intensity interval training improves liver and adipose tissue insulin sensitivity
Source: PubMed Central journal article supplement — Mol Metab. 2015 Oct 9;4(12):903–15. doi: 10.1016/j.molmet.2015.09.006 (PMC4731736; doi:10.1016/j.molmet.2015.09.006), 2015-10-09

# Supplementary Figure 1

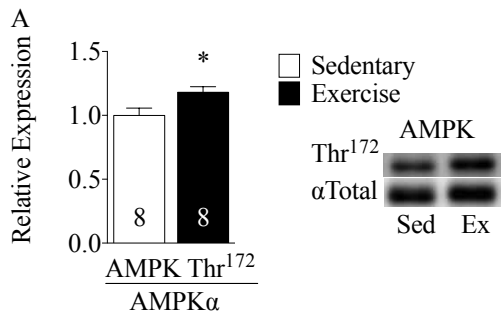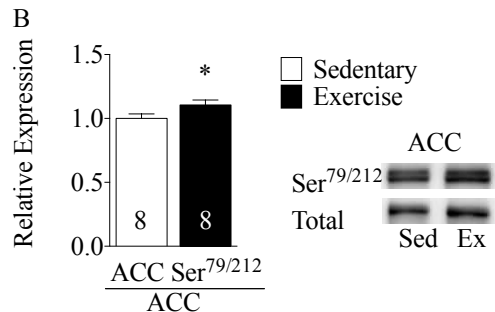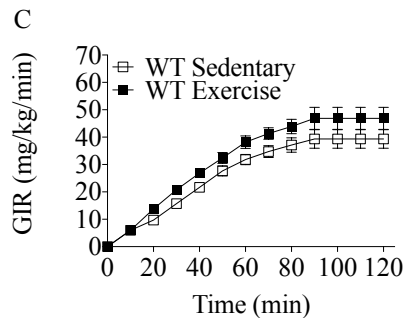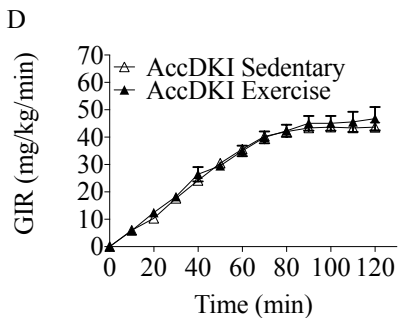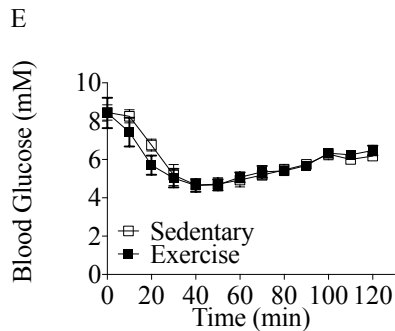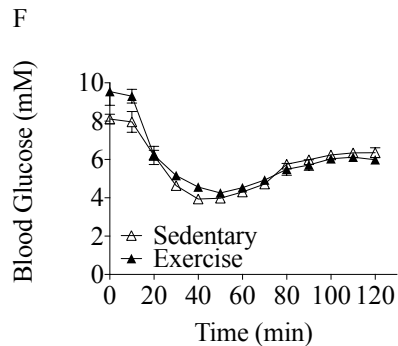

Supplement: mmc1.pdf [file mmc1.pdf]
